# Supplementary material for: Distance-based β-amyloid protein detection on PADs for the scanning and subsequent follow-up of Alzheimer's disease in human urine samples
Source: Royal Society of Chemistry journal article supplement (doi:10.1039/d1an01605a), 2022-01-01
Supplement: d1an01605a1.pdf [file d1an01605a1.pdf]

## Supporting Information

### **Distance-based $\beta$ -amyloid protein detection on PADs for scanning and subsequent follow up of Alzheimer's disease in human urine sample**

Kawin Khachornsakkul, Anongnat Tiangtrong, Araya Suwannasom, Wuttichai Sangkharoek,  
Opor Jamjumrus, Wijitar Dungchai\*

\* Department of Chemistry, Faculty of Science, King Mongkut's University of Technology  
Thonburi, Prachautid Road, Thungkru, Bangkok, 10140, Thailand.

*\*To whom correspondence should be addressed. Email: [wijitar.dun@kmutt.ac.th](mailto:wijitar.dun@kmutt.ac.th)*

*Preparation of buffer solution*

Phosphate buffer solution; PBS (50.0 mmol/L, pH 7.4) was prepared by mixing disodium phosphate and monosodium phosphate with DI water and then adjusted pH with 0.20 mol/L sodium hydroxide and/or 0.20 mol/L hydrochloric acid.

Citrate buffer solution; CBS (0.30 mol/L, pH 5.0) was prepared by mixing sodium citrate and citric acid with DI water and then adjusted pH with 0.20 mol/L sodium hydroxide and/or 0.20 mol/L hydrochloric acid.

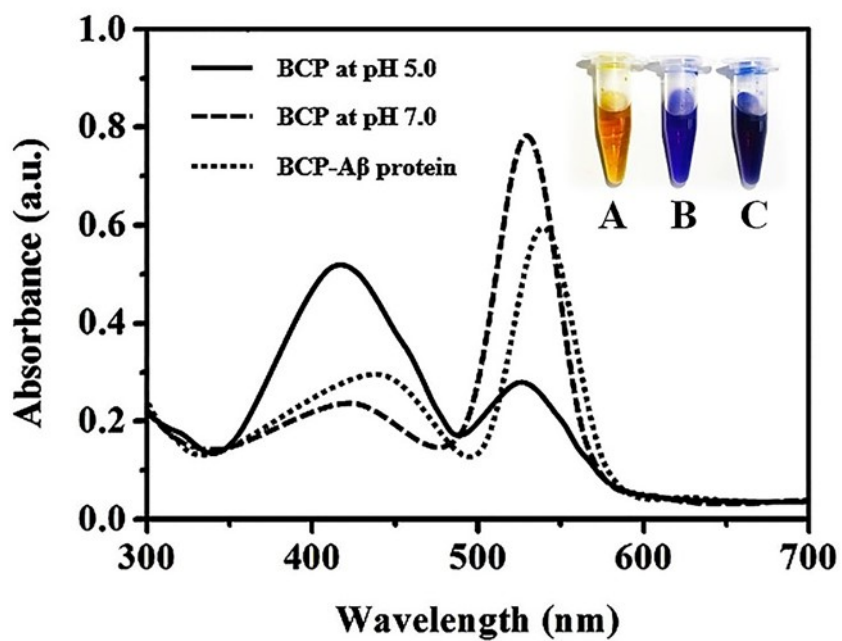

**Figure. S1** Adsorption spectra of 1.0 g/L of BCP solution at pH 5.0 (solid line), pH 7.0 (dash line) and BCP mixed with 2.5 ng/mL of A $\beta$  protein solution at pH 5.0 (dot line), corresponding to color solution (insert A~C).

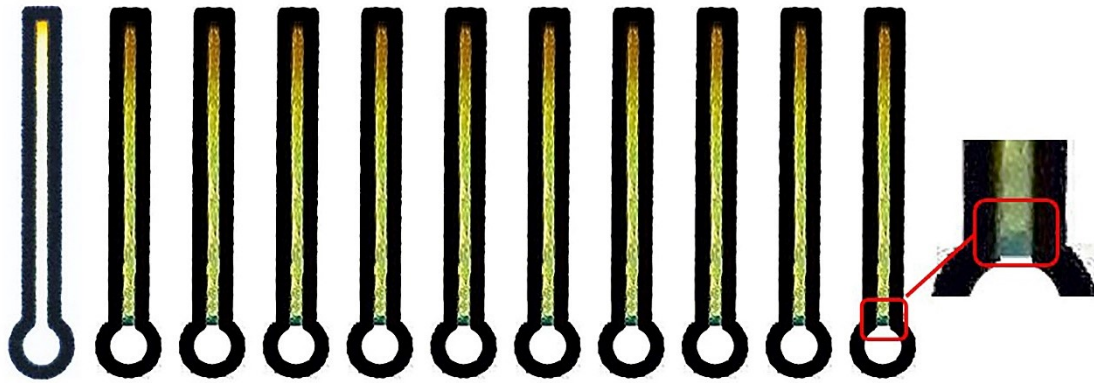

**Figure. S2** Distance signal of a detection limit at 0.20 ng/mL of A $\beta$  protein using the developed dPADs (n=10).
